# Supplementary material
Source: MDPI journal article supplement (https://www.mdpi.com/2073-4395/11/5/940)
Supplement: s1 [file s1]

# Supplementary Materials: Assessment of Maize Growth and Development with High- and Medium-Resolution Remote Sensing Products

Firstname Lastname, Firstname Lastname and Firstname Lastname Rocío Ballesteros, Miguel A. Moreno, Fellype Barroso, Laura González-Gómez and José F. Ortega

**Table S1.** Sampling events coordinates (ETRS89, UTM30N EPSG: 25830)

| Season      | Sampling date event        | GDD  | Sampling plots coordinates |             |
|-------------|----------------------------|------|----------------------------|-------------|
|             |                            |      | X (m)                      | Y (m)       |
| Season 2011 | 22 <sup>nd</sup> June      | 409  | 592209.867                 | 4345279.155 |
|             |                            |      | 592231.724                 | 4345283.935 |
|             |                            |      | 592209.182                 | 4345253.953 |
|             | 20 <sup>th</sup> August    | 1244 | 592226.249                 | 4345285.391 |
|             |                            |      | 592219.399                 | 4345277.872 |
|             |                            |      | 592227.675                 | 4345275.521 |
|             | 30 <sup>th</sup> August    | 1412 | 592207.469                 | 4345270.298 |
|             |                            |      | 592200.296                 | 4345269.034 |
|             |                            |      | 592205.280                 | 4345261.906 |
| Season 2012 | 21 <sup>st</sup> June      | 428  | 592200.296                 | 4345269.034 |
|             |                            |      | 592209.867                 | 4345279.155 |
|             |                            |      | 592196.223                 | 4345258.178 |
|             | 12 <sup>th</sup> July      | 698  | 592194.442                 | 4345254.657 |
|             |                            |      | 592207.469                 | 4345270.298 |
|             |                            |      | 592220.449                 | 4345285.358 |
|             | 14 <sup>th</sup> August    | 1198 | 592205.280                 | 4345261.906 |
|             |                            |      | 592211.548                 | 4345268.611 |
|             |                            |      | 592219.399                 | 4345277.872 |
|             | 28 <sup>th</sup> August    | 1455 | 592226.249                 | 4345285.391 |
|             |                            |      | 592204.916                 | 4345253.315 |
|             |                            |      | 592219.222                 | 4345270.746 |
| Season 2015 | 10 <sup>th</sup> September | 1640 | 592209.182                 | 4345253.953 |
|             |                            |      | 592231.724                 | 4345283.935 |
|             |                            |      | 592227.675                 | 4345275.521 |
|             | 29 <sup>th</sup> May       | 403  | 587110.563                 | 4345635.139 |
|             |                            |      | 587088.128                 | 4345521.094 |
|             |                            |      | 586981.366                 | 4345460.565 |
|             |                            |      | 587022.075                 | 4345263.453 |
|             | 10 <sup>th</sup> June      | 576  | 587087.639                 | 4345626.033 |
|             |                            |      | 587055.054                 | 4345497.649 |
|             |                            |      | 587022.499                 | 4345434.187 |
|             |                            |      | 587041.583                 | 4345220.089 |
|             | 25 <sup>th</sup> June      | 784  | 587083.450                 | 4345641.632 |

| Season      | Sampling date event       | GDD  | Sampling plots coordinates |             |
|-------------|---------------------------|------|----------------------------|-------------|
|             |                           |      | X (m)                      | Y (m)       |
| Season 2016 | 8 <sup>th</sup> July      | 1016 | 586976.208                 | 4345515.744 |
|             |                           |      | 586971.571                 | 4345449.310 |
|             |                           |      | 587002.994                 | 4345355.548 |
|             |                           |      | 587059.251                 | 4345633.872 |
|             |                           |      | 587031.335                 | 4345510.450 |
|             | 24 <sup>th</sup> July     | 1300 | 587024.073                 | 4345453.408 |
|             |                           |      | 587026.734                 | 4345325.639 |
|             |                           |      | 587080.331                 | 4345633.137 |
|             |                           |      | 587022.240                 | 4345516.063 |
|             | 6 <sup>th</sup> August    | 1534 | 586999.405                 | 4345491.313 |
|             |                           |      | 587018.627                 | 4345333.584 |
|             |                           |      | 587051.179                 | 4345585.132 |
|             |                           |      | 587070.377                 | 4345521.763 |
|             | 19 <sup>th</sup> August   | 1757 | 586998.759                 | 4345453.557 |
|             |                           |      | 587055.129                 | 4345284.731 |
|             |                           |      | 587088.391                 | 4345599.775 |
|             |                           |      | 587117.865                 | 4345515.224 |
|             | 2 <sup>nd</sup> September | 1984 | 586946.016                 | 4345478.241 |
|             |                           |      | 587004.498                 | 4345298.602 |
|             |                           |      | 587105.603                 | 4345592.528 |
|             |                           |      | 587070.793                 | 4345478.383 |
|             | 14 <sup>th</sup> June     | 561  | 586946.338                 | 4345399.901 |
|             |                           |      | 587027.665                 | 4345241.054 |
|             |                           |      | 586953.180                 | 4345951.495 |
|             | 27 <sup>th</sup> June     | 739  | 586944.350                 | 4345846.336 |
|             |                           |      | 586730.820                 | 4345579.223 |
|             |                           |      | 586938.377                 | 4345936.334 |
|             | 13 <sup>th</sup> July     | 1011 | 586934.655                 | 4345881.143 |
|             |                           |      | 586750.935                 | 4345594.215 |
|             |                           |      | 586958.365                 | 4345926.346 |
|             | 21 <sup>st</sup> July     | 1143 | 586924.647                 | 4345866.128 |
|             |                           |      | 586740.935                 | 4345614.212 |
|             |                           |      | 586933.377                 | 4345986.332 |
|             | 3 <sup>rd</sup> August    | 1368 | 586954.647                 | 4345871.122 |
|             |                           |      | 586740.935                 | 4345609.213 |
|             |                           |      | 586908.377                 | 4345991.330 |
|             | 19 <sup>th</sup> August   | 1628 | 586949.645                 | 4345851.124 |
|             |                           |      | 586720.937                 | 4345614.212 |
|             |                           |      | 586928.375                 | 4345961.332 |
|             | 26 <sup>th</sup> August   | 1745 | 586954.647                 | 4345861.124 |
|             |                           |      | 586745.932                 | 4345579.211 |

| Season | Sampling date event        | GDD        | Sampling plots coordinates |             |
|--------|----------------------------|------------|----------------------------|-------------|
|        |                            |            | X (m)                      | Y (m)       |
|        | 7 <sup>th</sup> September  | 1952       | 586919.649                 | 4345896.125 |
|        |                            |            | 586720.935                 | 4345599.213 |
|        |                            |            | 586908.377                 | 4345971.332 |
|        |                            |            | 586964.647                 | 4345876.124 |
|        |                            |            | 586715.935                 | 4345579.211 |
|        | 23 <sup>th</sup> September | 2159.98395 | 586933.375                 | 4345931.334 |
|        |                            |            | 586924.647                 | 4345886.125 |
|        |                            |            | 586775.933                 | 4345634.214 |

GDD: growing degree days

**Figure S1.** Visual Atmospheric Resistance Index from unmanned aerial vehicle values for 2011, 2012, 2015, and 2016 seasons, Visual Atmospheric Resistance Index from Landsat values for 2011, 2012, and 2015 seasons, and Visual Atmospheric Resistance Index from Sentinel values for 2016 season

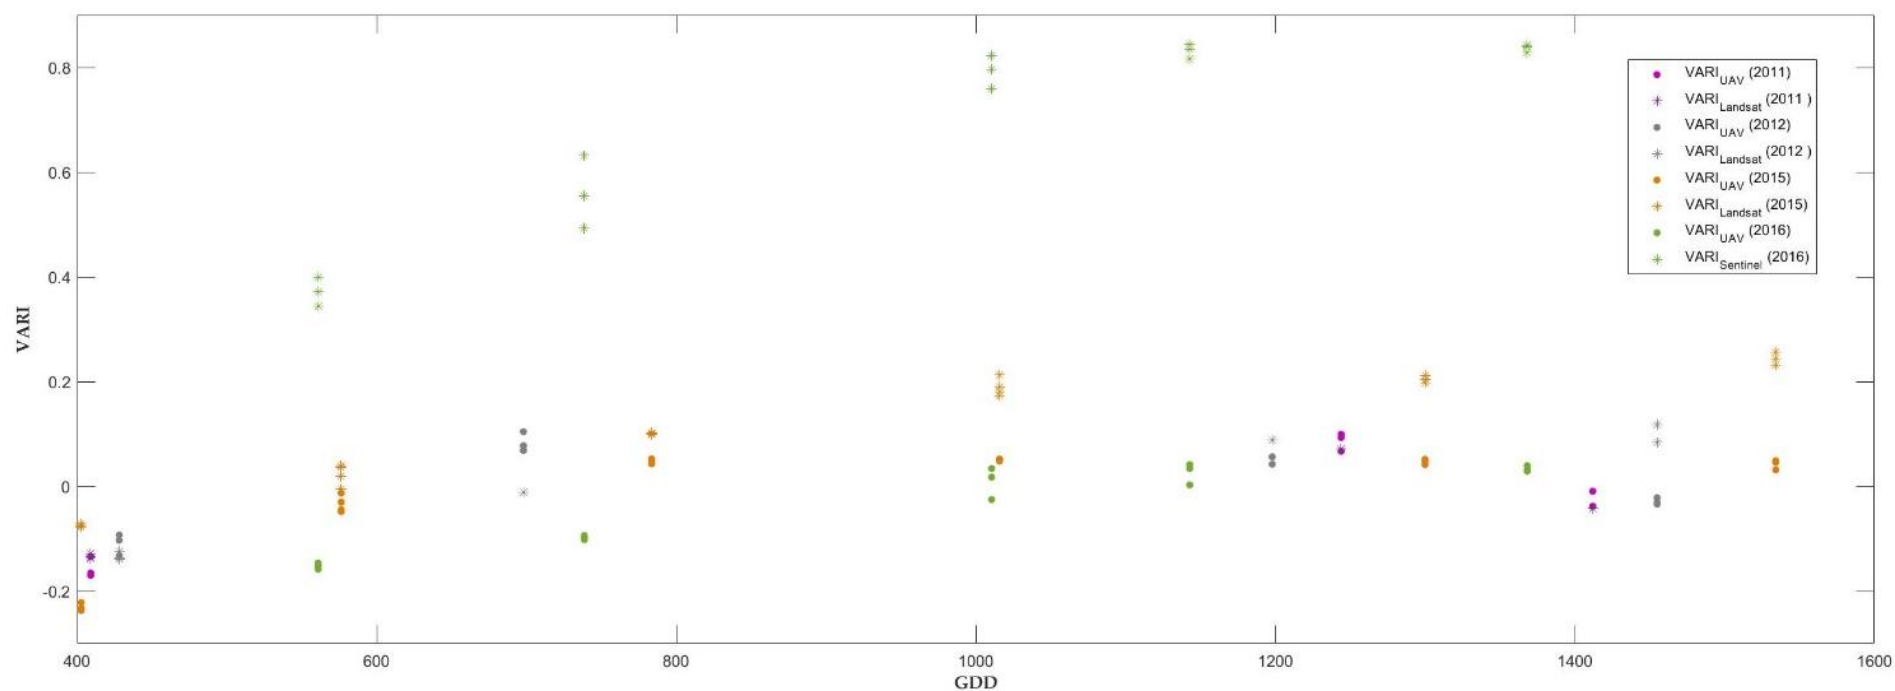

GDD: growing degree days, VARI: Visual Atmospheric Resistance Index, UAV: unmanned aerial vehicle
